# Supplementary material for: Novel Formula of Antiprotozoal Mixtures
Source: MDPI journal article supplement (doi:10.3390/antibiotics11070913), 2022-07-07
Supplement: s1 [file s1]

# Novel formula of antiprotozoal mixtures

Hubert Iwiński <sup>1,3\*</sup>, Jacek Łyczko<sup>1</sup>, Henryk Różański <sup>2,3</sup> and Antoni Szumny <sup>1</sup>

Table of content

|                                                                |   |
|----------------------------------------------------------------|---|
| Figure S1. GC-MS chromatogram of tea tree essential oil .....  | 1 |
| Table S1. Composition of tea tree essential oil .....          | 1 |
| Figure S2. GC-MS chromatogram of cedar essential oil .....     | 3 |
| Table S2 Composition of Cedar essential oil .....              | 3 |
| Figure S3. GC-MS chromatogram of eucalyptus essential oil..... | 4 |
| Table S3 Composition of eucalyptus essential oil.....          | 4 |
| Figure S4. GC-MS chromatogram of lavender oil .....            | 5 |
| Table S4. Composition of lavender essential oil .....          | 5 |

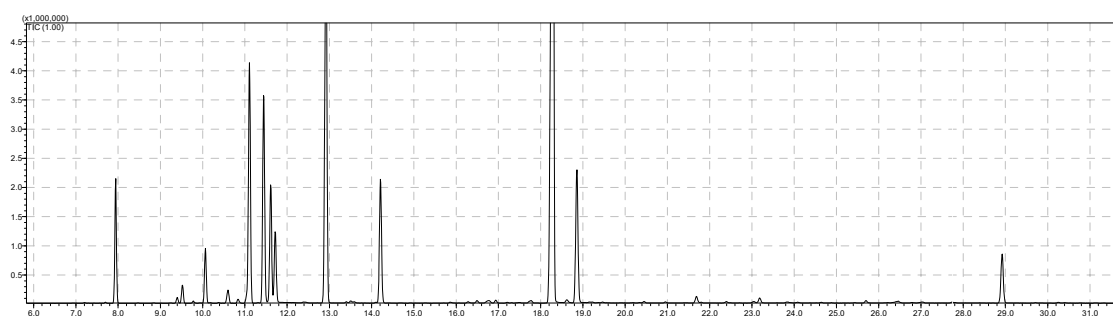

Figure S1. GC-MS chromatogram of tea tree essential oil

Table S1. Composition of tea tree essential oil

| No. | Peak Name              | tR (min) | KI exp. | KI Adams | KI NIST | CAS        | Area (%) |
|-----|------------------------|----------|---------|----------|---------|------------|----------|
| 1   | Hexadienol             | 7.208    | 915     |          | 916     | 17102-64-6 | 0.032    |
| 2   | $\alpha$ -Thujene      | 7.700    | 931     |          | 929     | 2867-05-2  | 0.03     |
| 3   | $\alpha$ -Pinene       | 7.950    | 938     | 939      | 938     | 80-56-8    | 3.835    |
| 4   | Sabinene               | 9.400    | 977     |          | 974     | 3387-41-5  | 0.189    |
| 5   | b-Pinene               | 9.533    | 980     | 979      | 979     | 127-91-3   | 0.606    |
| 6   | p-Menth-2-ene          | 9.775    | 986     |          | 984     | 5256-65-5  | 0.084    |
| 7   | $\beta$ -Myrcene       | 10.058   | 992     |          | 991     | 123-35-3   | 1.77     |
| 8   | Carene < $\delta$ -2-> | 10.383   | 999     |          | 1001    | 554-61-0   | 0.035    |
| 9   | $\alpha$ -Phellandrene | 10.600   | 1005    |          | 1005    | 99-83-2    | 0.518    |
| 10  | 3-Carene               | 10.842   | 1012    |          | 1010    | 498-15-7   | 0.159    |
| 11  | $\alpha$ -Terpinene    | 11.108   | 1019    |          | 1017    | 99-86-5    | 8.994    |
| 12  | p-Cymene               | 11.442   | 1028    |          | 1024    | 99-87-6    | 7.624    |
| 13  | Limonene               | 11.608   | 1032    |          | 1031    | 5989-27-5  | 3.966    |
| 14  | Eucalyptol             | 11.725   | 1035    |          | 1032    | 470-82-6   | 2.263    |

|    |                                              |        |      |      |                 |           |       |
|----|----------------------------------------------|--------|------|------|-----------------|-----------|-------|
| 15 | Ocimene                                      | 12.392 | 1051 | 1050 | 3779-61-1       | 0.062     |       |
| 16 | $\gamma$ -Terpinene                          | 12.917 | 1063 | 1060 | 99-85-4         | 15.384    |       |
| 17 | p-Mentha-3,8-diene                           | 13.400 | 1073 | 1075 | 586-67-4        | 0.033     |       |
| 18 | cis-Linalool oxide                           | 13.508 | 1075 | 1069 | 5989 - 33 - 3   | 0.053     |       |
| 19 | Cresol <para->                               | 13.583 | 1077 | 1073 | 106 - 44 - 5    | 0.02      |       |
| 20 | p-Mentha-2,4(8)-diene                        | 14.100 | 1088 | 1085 | 586-63-0        | 0.013     |       |
| 21 | Terpinolene                                  | 14.208 | 1090 | 1086 | 586 - 62 - 9    | 4.827     |       |
| 22 | Dihydrocitronellal                           | 15.858 | 1128 | 1125 | 5988 - 91 - 0   | 0.053     |       |
| 23 | Terpin-3-en-1-ol                             | 16.283 | 1138 | 1136 | 586 - 82 - 3    | 0.067     |       |
| 24 | cis-b-Terpineol                              | 16.492 | 1142 | 1140 | 7299-41-4       | 0.112     |       |
| 25 | Camphor                                      | 16.775 | 1149 | 1144 | 464-49-3        | 0.186     |       |
| 26 | Isopulegol                                   | 16.942 | 1152 | 1150 | 7786-67-6       | 0.121     |       |
| 27 | unknown                                      | 17.208 | 1158 |      |                 | 0.036     |       |
| 28 | Isoborneol                                   | 17.500 | 1164 | 1165 | 10385 - 78 - 1  | 0.046     |       |
| 29 | Thujol                                       | 17.775 | 1170 | 1169 | 21653 - 20 - 3  | 0.157     |       |
| 30 | 1-Terpinen-4-ol                              | 18.250 | 1180 | 1177 | 562-74-3        | 39.239    |       |
| 31 | Cymen-8-ol                                   | 18.625 | 1188 | 1189 | 1197 - 01 - 9   | 0.134     |       |
| 32 | $\gamma$ -Terpineol                          | 18.858 | 1192 | 1197 | 586-81-2        | 5.576     |       |
| 33 | trans-Dihydro carvone                        | 19.167 | 1198 | 1201 | 1200            | 147-86-02 | 0.054 |
| 34 | unknown                                      | 19.467 | 1205 |      |                 | 0.038     |       |
| 35 | neoiso-Dihydro carveol                       | 20.450 | 1229 | 1230 | 18675 - 34 - 8  | 0.089     |       |
| 36 | Isobornyl formate                            | 20.958 | 1240 | 1240 | 1200 - 67 - 5   | 0.054     |       |
| 37 | Cinnamyl alcohol<Z->                         | 21.683 | 1257 | 1261 | 4510 - 34 - 3   | 0.253     |       |
| 38 | Carvone oxide<cis->                          | 21.800 | 1259 | 1262 | 18383 - 49 - 8  | 0.014     |       |
| 39 | Isopulegyl acetate                           | 22.400 | 1272 | 1273 | 89 - 49 - 6     | 0.094     |       |
| 40 | neo-Isopulegyl acetate                       | 23.042 | 1286 | 1278 | 109010 - 10 - 8 | 0.061     |       |
| 41 | Isobornyl acetate                            | 23.183 | 1289 | 1287 | 125 - 12 - 2    | 0.214     |       |
| 42 | Terpinyl acetate <trans-dihydro- $\alpha$ -> | 23.833 | 1302 | 1300 | 20777-41-7      | 0.068     |       |
| 43 | a-Terpinyl formate                           | 24.083 | 1308 | 1306 | 2153 - 26 - 6   | 0.04      |       |
| 44 | Dihydrocarvyl acetate                        | 24.642 | 1322 | 1325 | 20405 - 60 - 1  | 0.03      |       |
| 45 | a-Terpinyl acetate                           | 25.700 | 1347 | 1349 | 80 - 26 - 2     | 0.13      |       |
| 46 | Cyclosativene                                | 26.467 | 1365 | 1367 | 30541 - 92 - 5  | 0.205     |       |
| 47 | Longicyclene                                 | 27.033 | 1377 | 1372 | 1137 - 12 - 8   | 0.076     |       |
| 48 | 7-Epi-Sesquithujene                          | 27.742 | 1393 | 1389 | 159407 - 35 - 9 | 0.081     |       |
| 49 | Caryophyllene                                | 28.933 | 1422 | 1419 | 87-44-5         | 2.235     |       |
| 50 | Humulene                                     | 30.258 | 1455 | 1454 | 6753-98-6       | 0.039     |       |

tR – retention time; KI exp.– Kovats index experimental, KI Adams– Kovats index according to Adams library, KI NIST – Kovats index according to NIST library

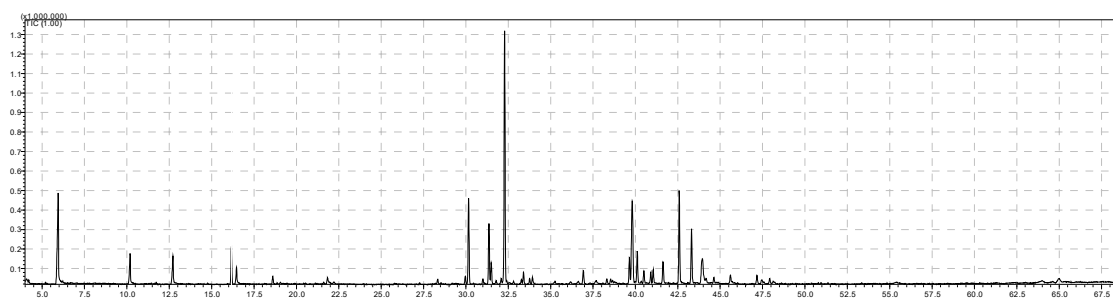

Figure S2. GC-MS chromatogram of cedar essential oil

Table S2 Composition of Cedar essential oil

| No. | Peak Name                        | tR (min) | KI exp. | KI Adams | KI NIST | CAS             | Area (%) |
|-----|----------------------------------|----------|---------|----------|---------|-----------------|----------|
| 1   | Limona ketone                    | 16.167   | 1135    | 1131     | 1137    | 6090-09-1       | 3.656    |
| 2   | cia-b-terpineol                  | 16.467   | 1142    | 1144     | 1144    | 7299-41-4       | 2.072    |
| 3   | Melilotal                        | 18.608   | 1187    | 1188     | 1183    | 122 - 00 - 9    | 0.887    |
| 4   | <i>trans</i> -Myrtanol           | 21.833   | 1260    |          | 1262    | 15358-91-5      | 0.687    |
| 5   | Vestitenone                      | 29.967   | 1448    |          | 1448    | 69401-36-1      | 0.859    |
| 6   | $\alpha$ -Himachalene            | 30.158   | 1452    |          | 1499    | 3853-83-6       | 9.072    |
| 7   | Thujopsadiene <cis->             | 31.000   | 1473    |          | 1467    | 51446 - 91 - 4  | 0.456    |
| 8   | Himachalene <gamma-              | 31.492   | 1484    |          | 1484    | 53111 - 25 - 4  | 1.859    |
| 9   | b-Himachalene                    | 32.283   | 1502    |          | 1500    | 1461-03-6       | 27.350   |
| 10  | Himachalene <alpha-dehydro-ar->  | 32.808   | 1517    |          | 1517    | 78204 - 62 - 3  | 0.354    |
| 11  | Himachalene <gamma-dehydro-ar->  | 33.400   | 1532    |          | 1530    | 51766 - 65 - 5  | 1.148    |
| 12  | g-Vetivenene                     | 33.758   | 1541    |          | 1532    | 28908 - 26 - 1  | 0.638    |
| 13  | Bisabolene <(E)-, alpha->        | 33.925   | 1546    |          | 1541    | 25532 - 79 - 0  | 0.936    |
| 14  | Himachalene epoxide              | 35.258   | 1579    |          | 1579    | 64825 - 84 - 9  | 0.183    |
| 15  | b-Himachalene oxide              | 36.925   | 1623    |          | 1619    | 57819 - 73 - 5  | 1.733    |
| 16  | Cedren-13-ol<8->                 | 39.642   | 1695    |          | 1689    | 18319 - 40 - 9  | 2.234    |
| 17  | Atlantone<(Z)-gamma->            | 39.808   | 1699    |          | 1694    | 108549 - 48 - 0 | 12.261   |
| 18  | Atlantone<(E)-gamma->            | 40.108   | 1708    |          | 1707    | 108549 - 47 - 9 | 3.222    |
| 19  | Atlantone <(Z)-alpha->           | 40.500   | 1720    |          | 1716    | 56192 - 70 - 2  | 1.363    |
| 20  | Eremophilone                     | 40.908   | 1731    |          | 1733    | 562 - 23 - 2    | 1.126    |
| 21  | Tumerone                         | 41.050   | 1735    |          | 1734    | 180315-67-7     | 1.463    |
| 22  | Cyclocolorenone                  | 41.625   | 1752    |          | 1757    | 489 - 45 - 2    | 2.564    |
| 23  | Atlantone <trans-, alpha->       | 42.583   | 1778    |          | 1775    | 32207 - 08 - 2  | 9.638    |
| 24  | Acetoxyelemol<8-alpha->          | 43.308   | 1798    |          | 1793    | 256332 - 39 - 5 | 6.188    |
| 25  | Longifolol acetate               | 43.950   | 1818    |          | 1820    | 205697 - 15 - 0 | 4.841    |
| 26  | Khusinol acetate                 | 44.433   | 1835    |          | 1828    | 78405 - 34 - 2  | 0.620    |
| 27  | Flourensadiol                    | 45.608   | 1867    |          | 1670    | 55812 - 89 - 0  | 0.796    |
| 28  | Farnesyl acetone                 | 47.167   | 1913    |          | 1913    | 1117-52-8       | 1.135    |
| 29  | Acetoxyeudesman-4-alpha-ol <11-> | 47.925   | 1937    |          | 1940    | 67996 - 33 - 2  | 0.658    |

tR – retention time; KI exp.– Kovats index experimental, KI Adams– Kovats index according to Adams library, KI NIST – Kovats index according to NIST library

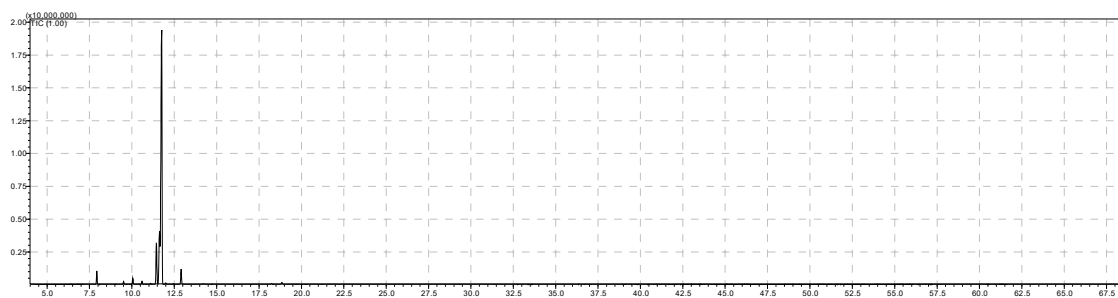

Figure S3. GC-MS chromatogram of eucalyptus essential oil

Table S3 Composition of eucalyptus essential oil

| No. | Peak Name                       | tR (min) | KI exp. | KI Adams | KI NIST | CAS        | Area (%) |
|-----|---------------------------------|----------|---------|----------|---------|------------|----------|
| 1   | $\alpha$ -Pinene                | 7.950    | 938     | 939      | 938     | 80-56-8    | 2.522    |
| 2   | b-Pinene                        | 9.533    | 980     | 979      | 979     | 127-91-3   | 0.576    |
| 3   | $\beta$ -Myrcene                | 10.058   | 992     |          | 991     | 123-35-3   | 1.203    |
| 4   | $\alpha$ -Phellandrene          | 10.600   | 1005    |          | 1005    | 99-83-2    | 0.715    |
| 5   | $\alpha$ -Terpinene             | 11.100   | 1019    |          | 1017    | 99-86-5    | 0.184    |
| 6   | p-Cymene                        | 11.450   | 1028    |          | 1025    | 99-87-6    | 9.831    |
| 7   | Eucalyptol                      | 11.725   | 1035    |          | 1032    | 470-82-6   | 80.665   |
| 8   | trans- $\beta$ -Ocimene         | 12.442   | 1052    |          | 1049    | 3779-61-1  | 0.091    |
| 9   | $\gamma$ -Terpinene             | 12.908   | 1062    |          | 1060    | 99-85-4    | 3.367    |
| 10  | trans-Linalool oxide (furanoid) | 14.225   | 1090    |          | 1086    | 34995-77-2 | 0.142    |
| 11  | 1-Terpinen-4-ol                 | 18.250   | 1180    |          | 1177    | 562-74-3   | 0.218    |
| 12  | $\gamma$ -Terpineol             | 18.858   | 1192    |          | 1197    | 586-81-2   | 0.486    |

tR – retention time; KI exp.– Kovats index experimental, KI Adams– Kovats index according to Adams library, KI NIST – Kovats index according to NIST library

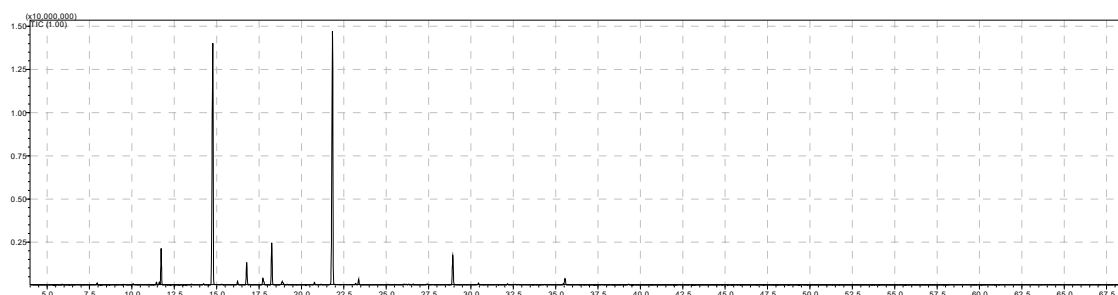

Figure S4. GC-MS chromatogram of lavender oil

Table S4. Composition of lavender essential oil

| No. | Peak Name                             | tR (min) | KI exp. | KI Adams | KI NIST | CAS        | Area (%) |
|-----|---------------------------------------|----------|---------|----------|---------|------------|----------|
| 1   | $\alpha$ -Pinene                      | 7.95     | 938     | 939      | 938     | 80-56-8    | 0.196    |
| 2   | b-Pinene                              | 9.533    | 980     | 979      | 979     | 127-91-3   | 0.063    |
| 3   | p-Cymene                              | 11.45    | 1028    |          | 1025    | 99-87-6    | 0.312    |
| 4   | Limonene                              | 11.617   | 1032    |          | 1030    | 138-86-3   | 0.249    |
| 5   | Eucalyptol                            | 11.725   | 1035    |          | 1032    | 470-82-6   | 4.029    |
| 6   | cis-Linalool oxide                    | 13.525   | 1076    |          | 1074    | 5989-33-3  | 0.166    |
| 7   | trans-Linalool oxide (furanoid)       | 14.225   | 1090    |          | 1086    | 34995-77-2 | 0.156    |
| 8   | Linalool                              | 14.775   | 1101    |          | 1099    | 78-70-6    | 37.262   |
| 9   | 1-Octen-3-yl-acetate                  | 15.292   | 1114    |          | 1111    | 2442-10-6  | 0.098    |
| 10  | 1,2-Dihydrolinalool                   | 16.233   | 1136    | 1135     | 1120    | 18479-51-1 | 0.498    |
| 11  | Camphor                               | 16.775   | 1149    |          | 1144    | 464-49-3   | 2.955    |
| 12  | Borneol                               | 17.725   | 1169    |          | 1166    | 464-45-9   | 1.271    |
| 13  | 1-Terpinen-4-ol                       | 18.25    | 1180    |          | 1177    | 562-74-3   | 5.461    |
| 14  | $\gamma$ -Terpineol                   | 18.858   | 1192    |          | 1197    | 586-81-2   | 0.531    |
| 15  | trans-Dihydro carvone                 | 19.167   | 1198    | 1201     | 1200    | 09.04.5948 | 0.09     |
| 16  | Fenchyl acetate                       | 20.767   | 1236    | 1234     | 1234    | 13851-11-1 | 0.312    |
| 17  | Butanoic acid, 3-methyl-, hexyl ester | 21.158   | 1245    | 1244     | 1244    | 10032-13-0 | 0.096    |
| 18  | Linalyl acetate                       | 21.833   | 1260    |          | 1257    | 115-95-7   | 38.875   |
| 19  | Isopulegol acetate                    | 23.2     | 1289    |          | 1285    | 57576-09-7 | 0.206    |
| 20  | Lavandulol acetate                    | 23.375   | 1292    |          | 1290    | 25905-14-0 | 0.728    |
| 21  | Hexyl tiglate                         | 25.117   | 1334    |          | 1330    | 16930-96-4 | 0.101    |
| 22  | 8-Hydroxylinalool*                    | 25.508   | 1343    |          | 1361    | 64142-78-5 | 0.089    |
| 23  | unknown                               | 26.05    | 1355    |          |         |            | 0.104    |
| 24  | Neryl acetate                         | 26.583   | 1367    |          | 1364    | 141-12-8   | 0.087    |
| 25  | Geranyl acetate                       | 27.417   | 1386    |          | 1382    | 105-87-3   | 0.178    |
| 26  | Caryophyllene                         | 28.933   | 1422    |          | 1419    | 87-44-5    | 4.244    |
| 27  | (E)- $\beta$ -Farnesene               | 30.45    | 1459    |          | 1457    | 18794-84-8 | 0.227    |
| 28  | Bicyclogermacrene                     | 32.158   | 1499    |          | 1500    | 24703-35-3 | 0.164    |
| 29  | Lavandulyl isovalerate                | 32.608   | 1511    |          | 1508    | 51117-21-6 | 0.138    |
| 30  | $\gamma$ -Cadinene                    | 32.808   | 1517    |          | 1514    | 39029-41-9 | 0.084    |
| 31  | Germacrene B                          | 34.35    | 1557    |          | 1559    | 15423-57-1 | 0.094    |
| 32  | Caryophyllene oxide                   | 35.55    | 1586    |          | 1581    | 1139-30-6  | 0.729    |
| 33  | tau-Cadinol                           | 37.733   | 1645    |          | 1642    | 147-47-90  | 0.071    |
| 34  | $\alpha$ -Bisabolol                   | 39.3     | 1686    |          | 1684    | 515-69-5   | 0.136    |

tR – retention time; KI exp.– Kovats index experimental, KI Adams– Kovats index according to Adams library, KI NIST – Kovats index according to NIST library
